# Supplementary material for: Selecting RAD-Seq Data Analysis Parameters for Population Genetics: The More the Better?
Source: PubMed Central journal article supplement (PMC6549478; doi:10.3389/fgene.2019.00533), 2019-05-29
Supplement: Data_Sheet_1.pdf [file Data_Sheet_1.pdf]

# Selecting RAD-seq data analysis parameters for population genetics: the more the better?

Natalia Díaz-Arce, Naiara Rodríguez-Ezpeleta

## Supplementary Figures

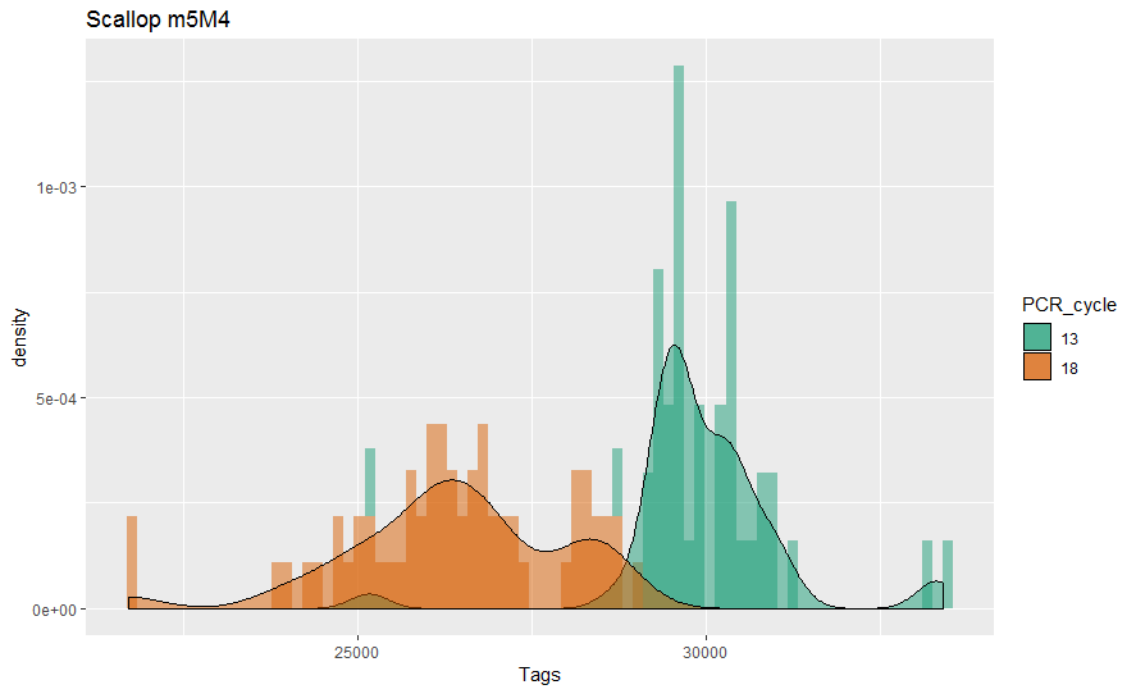

**Figure S1.** Frequency distribution of the number of assembled loci per individual in the Scallop dataset after applying the following parameters:  $m=5$   $M=4$ , and PCR clones filtered. The graph shows distribution for those samples for which 13 (green) and 18 (orange) PCR cycles were applied for library building.

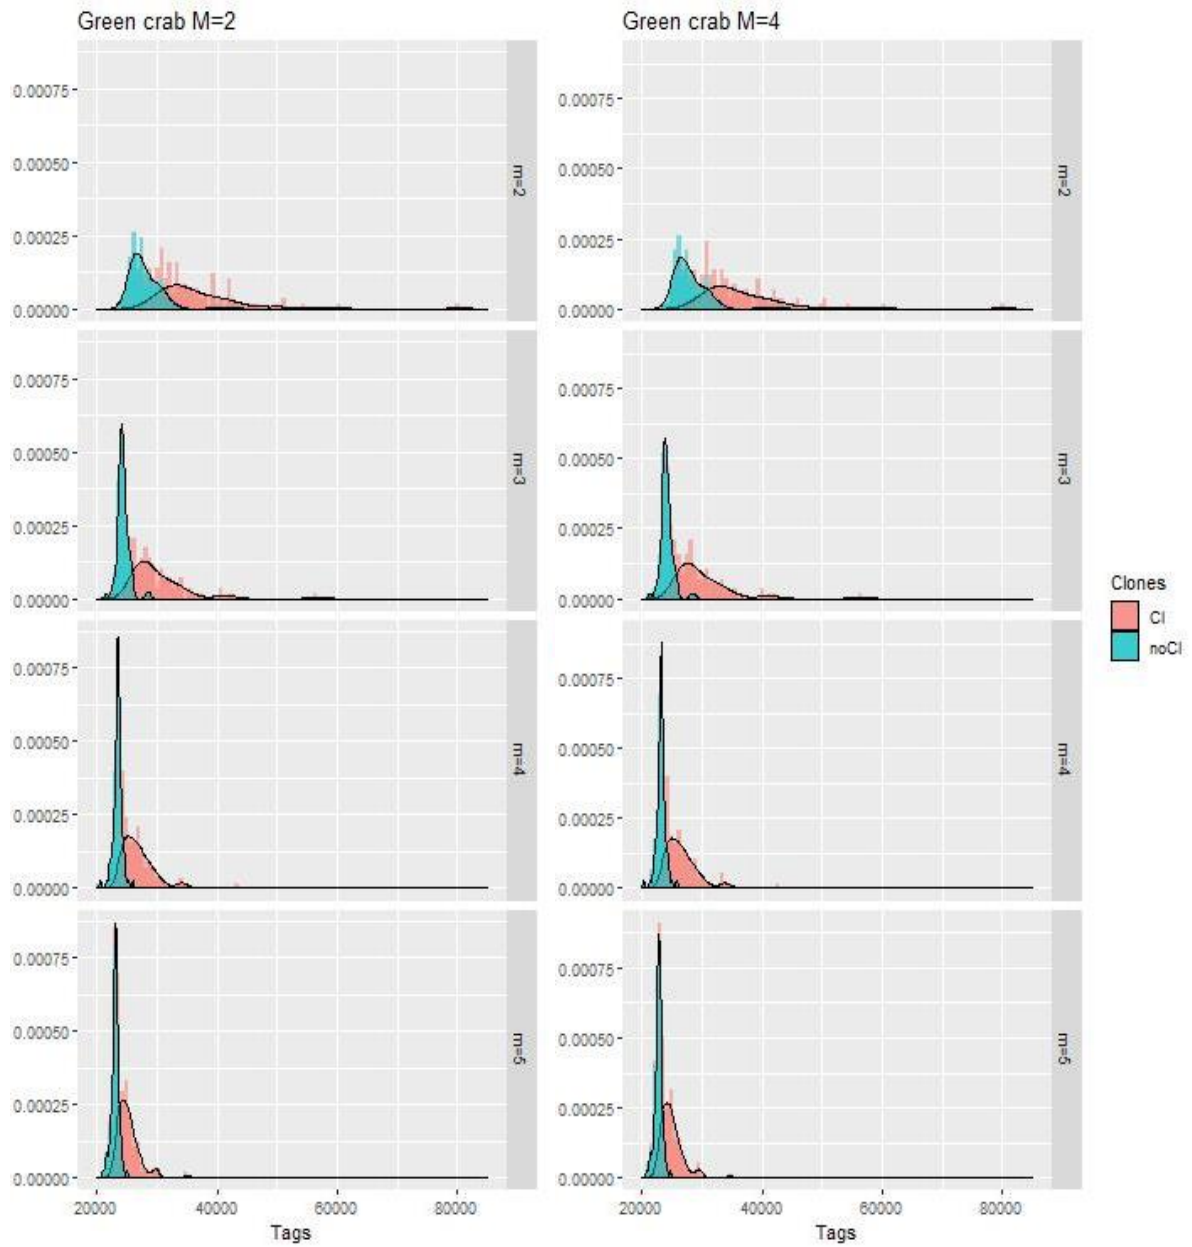

**Figure S2.** Frequency distribution of the number of tags per individual before (red) and after (blue) removing PCR clones for the different  $m$  and  $M$  combinations for the Green crab dataset.

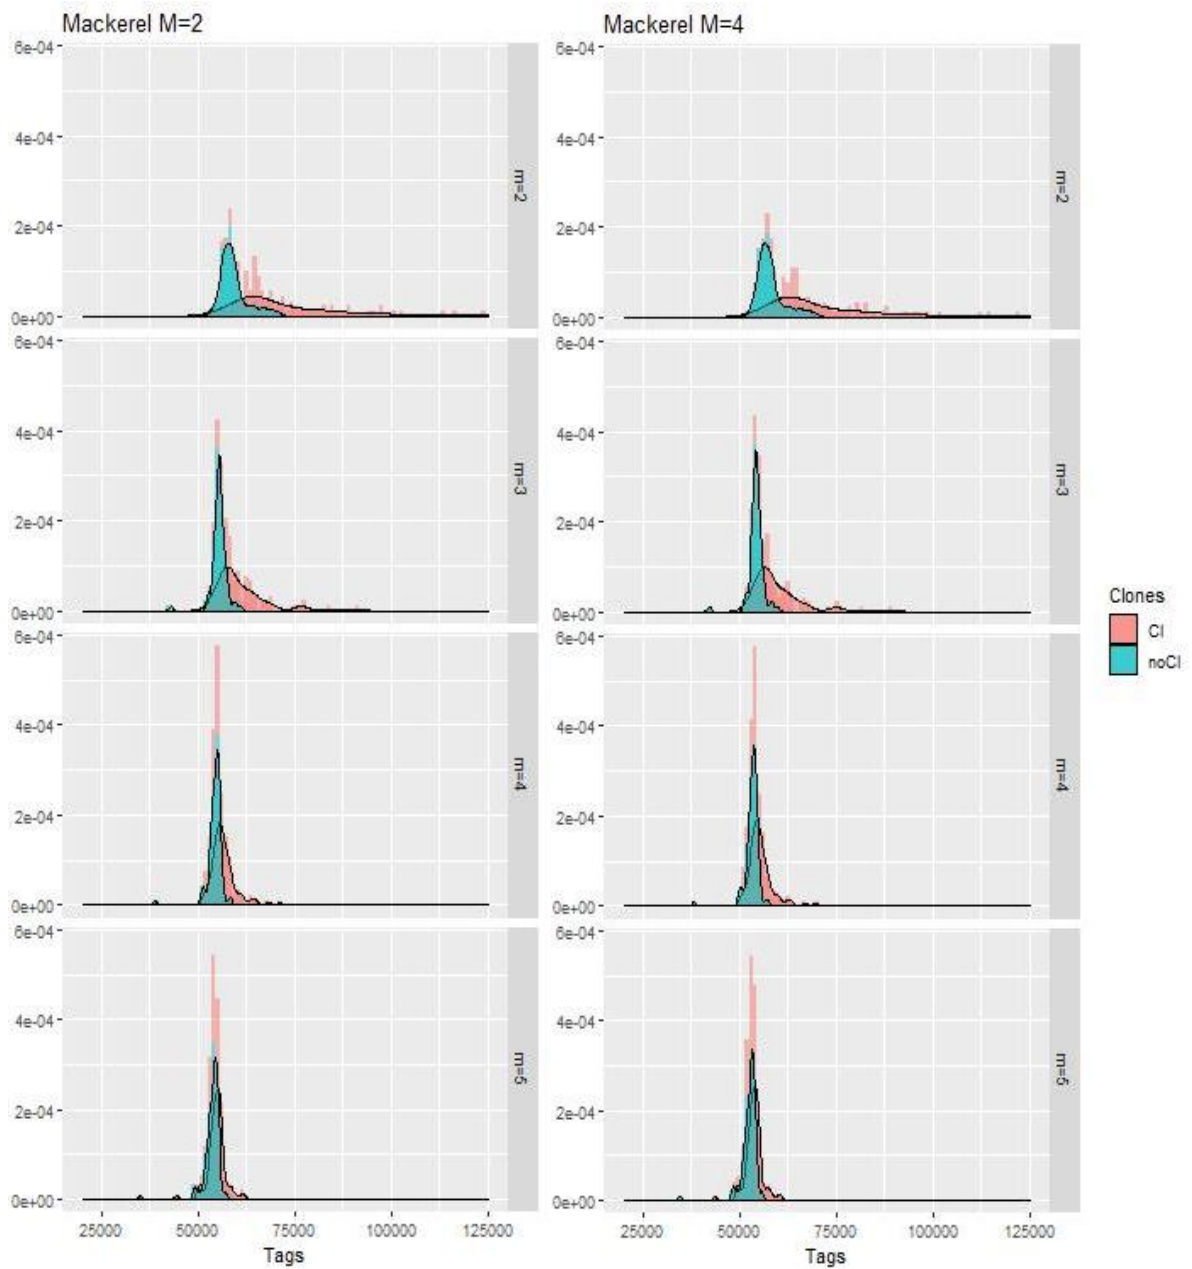

**Figure S3.** Frequency distribution of the number of tags per individual before (red) and after (blue) removing PCR clones for the different  $m$  and  $M$  combinations for the mackerel dataset.

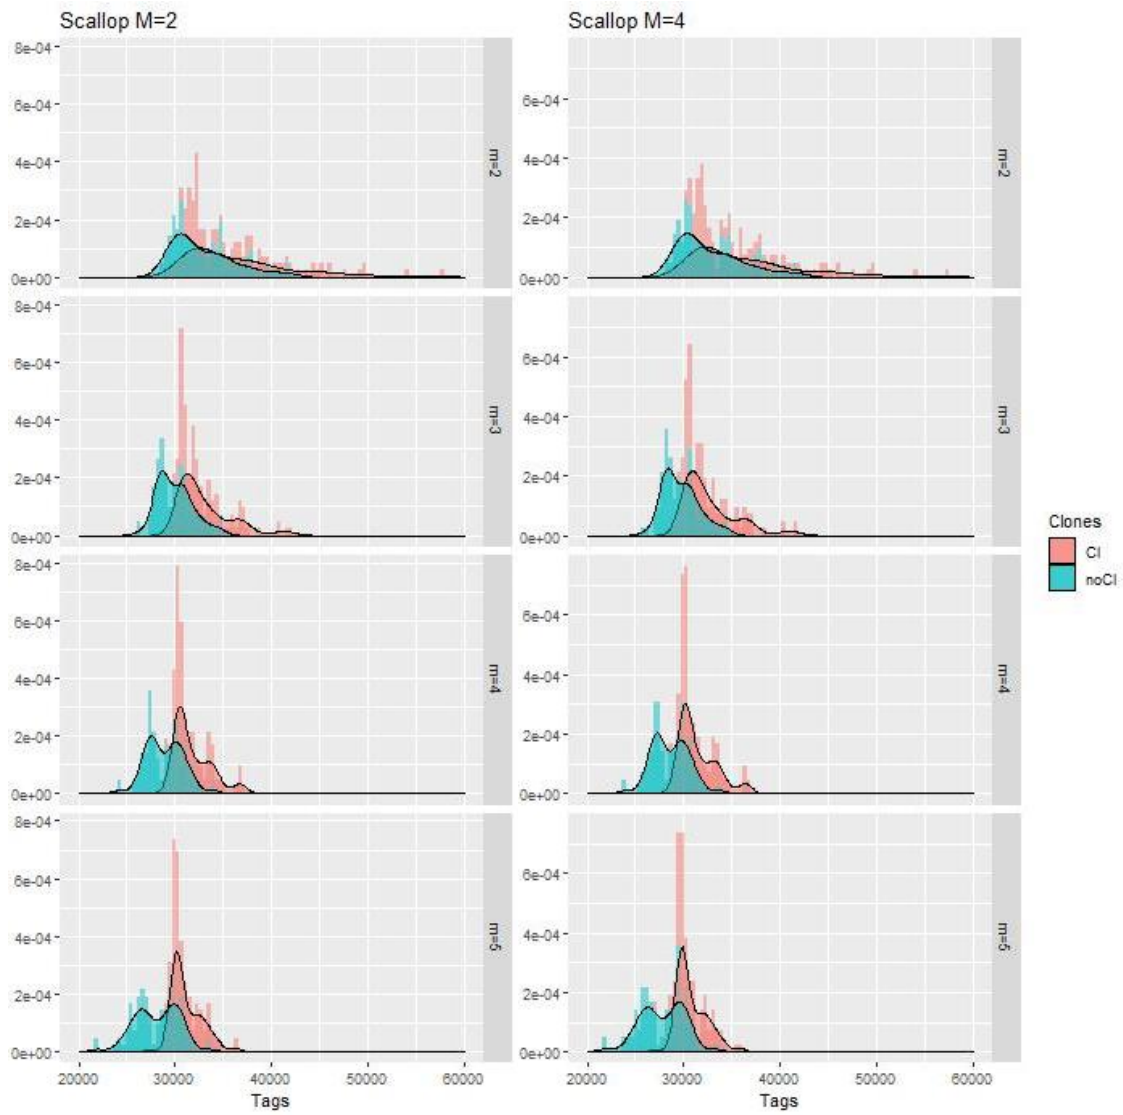

**Figure S4.** Frequency distribution of the number of tags per individual before (red) and after (blue) removing PCR clones for the different  $m$  and  $M$  combinations for the scallop dataset.

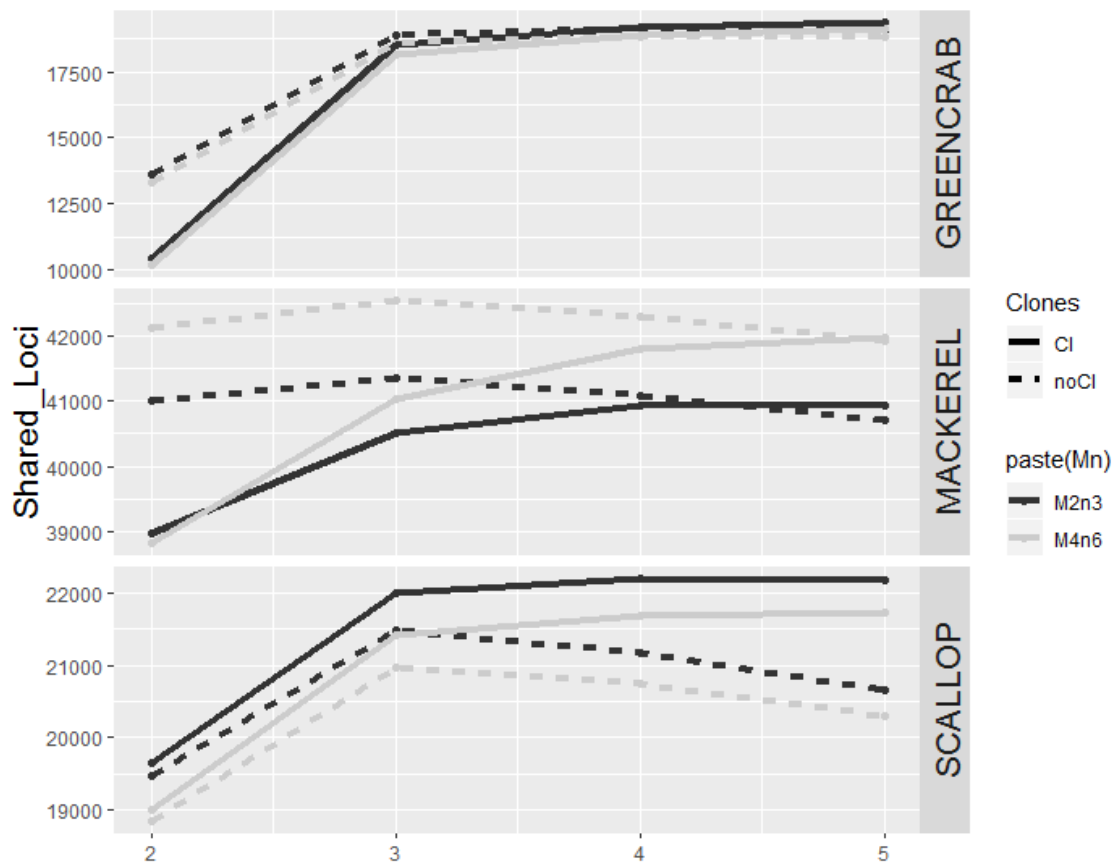

**Figure S5.** Total number of loci (both polymorphic and monomorphic) present in at least 75% of the individuals in all catalogs for different values of  $m$  (x axis), different combinations of  $M$  and  $n$  parameters ( $M=2$   $n=3$  in black and  $M=4$   $n=6$  in grey) and before (solid line) and after (dotted line) removing PCR clones.

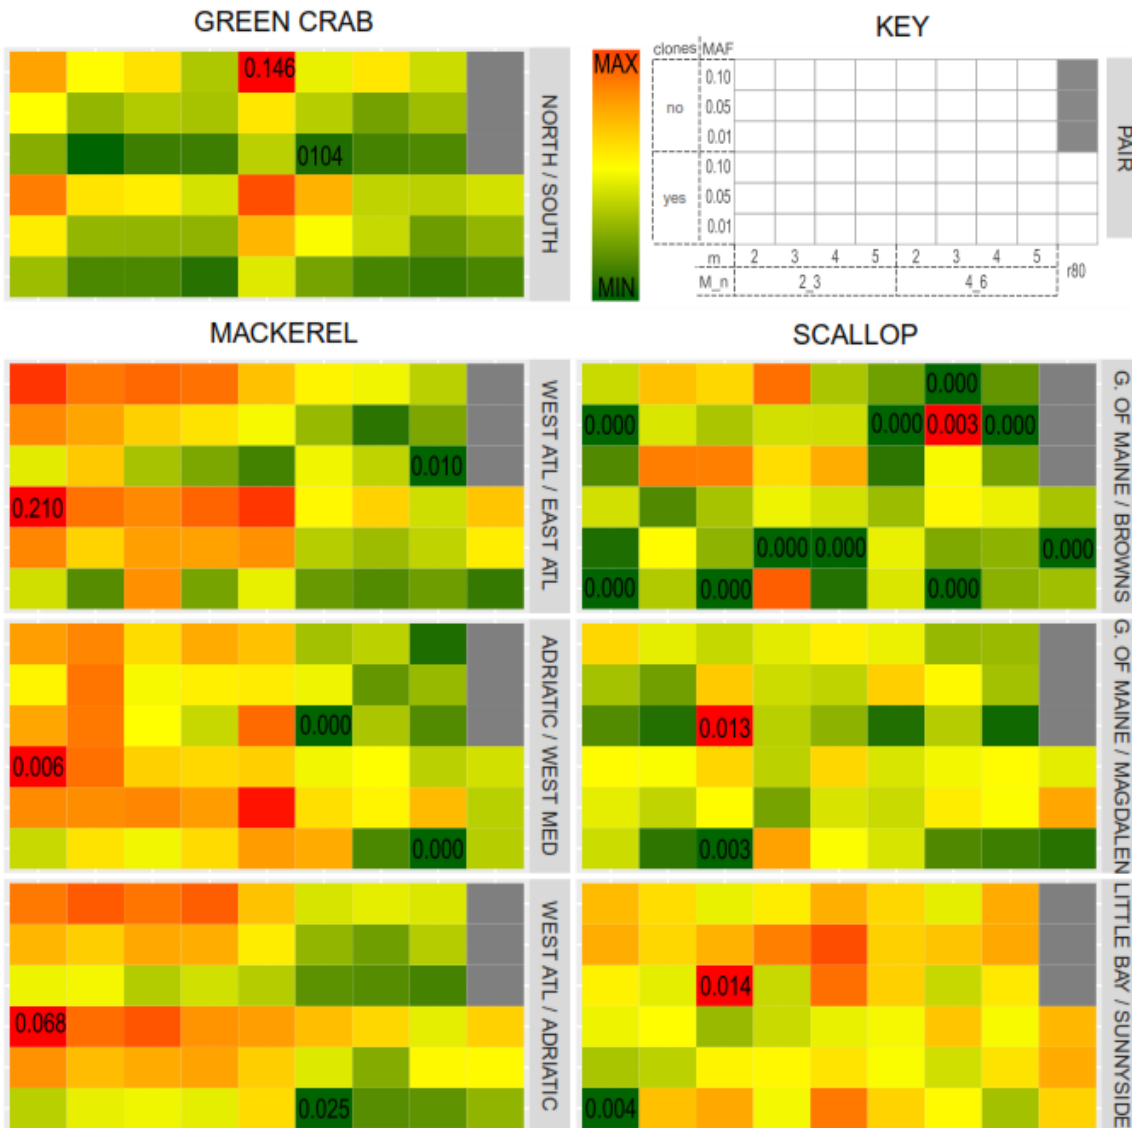

**Figure S6.** Average pairwise  $F_{ST}$  values for 2000 randomly selected SNPs from each catalog and population pairs for the three datasets: Northern/Southern green crab locations; Western/Eastern Atlantic Ocean, Adriatic Sea/Western Mediterranean Sea (intra-Mediterranean) and Western Atlantic/Adriatic Sea mackerel populations; Gulf of Maine/Magdalen Islands (northern/southern locations), Little Bay/Sunnyside (intra-North) and Gulf of Maine/ Browns Bank (intra-South) scallop locations. Color gradients represent  $F_{ST}$  values, from lowest (dark green) to highest (dark red). Minimum and maximum  $F_{ST}$  values for each pair are indicated in the corresponding cell.
